# Supplementary material for: Oestrogen Receptor Isoforms May Represent a Therapeutic Target in Oesophageal Adenocarcinoma
Source: MDPI journal article supplement (doi:10.3390/cancers14081891), 2022-04-08
Supplement: s1 [file s1]

# Oestrogen Receptor Isoforms May Represent a Therapeutic Target in Oesophageal Adenocarcinoma

Steven L. Due, David I. Watson, Isabell Bastian, Ann-Kathrin Eichelmann and Damian J. Hussey

**Table S1.** Characteristics of cell lines.

| Cell line | Est. | Pa-tient | Tumour                                                                         | Grade     | Stage    | Doubling Time | Growth Pattern                                  | Reference |
|-----------|------|----------|--------------------------------------------------------------------------------|-----------|----------|---------------|-------------------------------------------------|-----------|
| Eso-26    | 2000 | 56 M     | Type I gastro-oesophageal junction adenocarcinoma                              | -         | T4 N1 M1 | 35-50 h       | Loosely adherent spherical clumps in suspension | [1]       |
| Eso-51    | 2000 | 74 M     | Adenocarcinoma of distal oesophagus, arising in Barrett's                      | -         | IV       | -             | Spherical clumps in suspension                  | [1]       |
| Flo-1     | 1991 | 68 M     | Adenocarcinoma of distal oesophagus                                            | -         | -        | 40-50 h       | Adherent mono-layer                             | [2]       |
| JH-EsoAd1 | 2008 | 63 M     | Adenocarcinoma of distal oesophagus, arising in Barrett's                      | High      | T3 N0 M0 | 29 h          | Adherent mono-layer                             | [3]       |
| OACP4 C   | 1996 | 55 M     | Gastro-oesophageal junction adenocarcinoma                                     | -         | IV       | 35-50 h       | Adherent mono-layer                             | [4]       |
| OE-19     | 1993 | 72 M     | Primary gastro-oesophageal junction adenocarcinoma                             | Mod-erate | III      | 50-60 h       | Adherent in islands                             | [5]       |
| OE-33     | 1993 | 73 F     | Adenocarcinoma of distal oesophagus, arising in Barrett's                      | High      | IIA      | 30-33 h       | Adherent mono-layer                             | [5]       |
| SK-GT-4   | 1989 | 89 M     | Adenocarcinoma of distal oesophagus, arising in Barrett's                      | Low       | T2 N1 M0 | 30-39 h       | Adherent mono-layer                             | [6]       |
| MCF-7     | 1970 | 69 F     | Metastatic invasive ductal carcinoma of breast (derived from pleural effusion) | -         | IV       | 30-72 h       | Adherent mono-layer                             | [7]       |

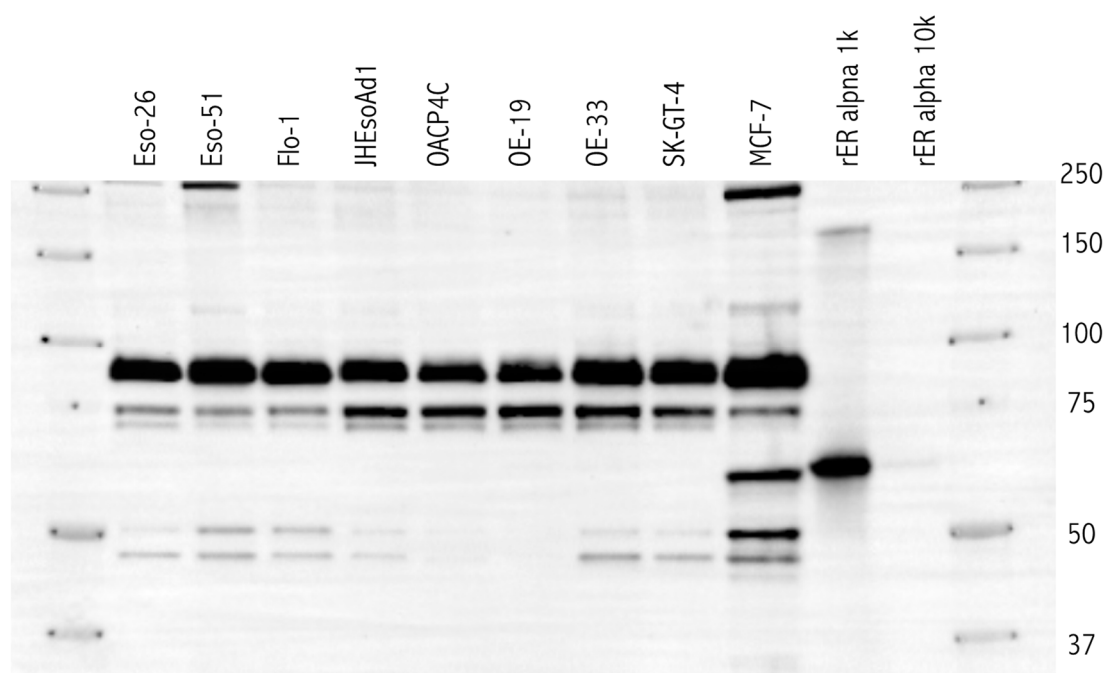

**Figure S1.** ER $\alpha$  Western blot image presented in Figure 1A.

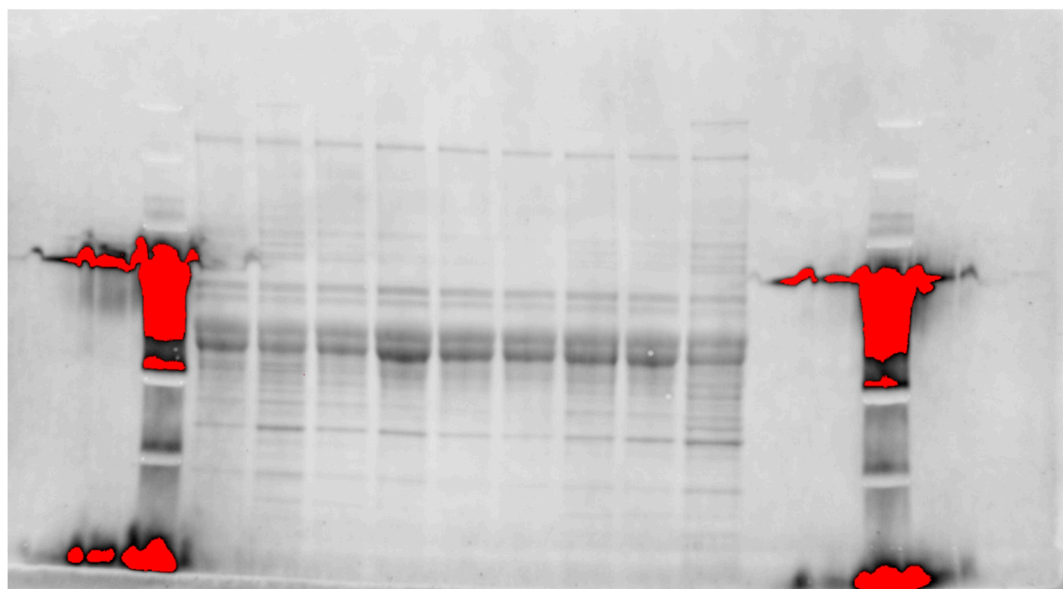

**Figure S2.** Total protein load image associated with Figure S1.

**Table S2.** Quantification data associated with ER $\alpha$  blot presented in Figure 1A.

| ER $\alpha$ western blot quantification |               |               |                |                  |                        |           |                      |
|-----------------------------------------|---------------|---------------|----------------|------------------|------------------------|-----------|----------------------|
| Protein load normalisation              |               |               |                |                  |                        |           |                      |
| Serial Number                           | Net Intensity | Sum Intensity | Mean Intensity | Bkgnd. Intensity | Interior Area (pixels) | Cell line | Normalisation Factor |
| 1                                       | 2625793.75    | 31061356.8    | 62497.6992     | 61969.3711       | 4970                   | Eso-26    | 1.88381356           |

|   |            |           |            |            |      |          |            |
|---|------------|-----------|------------|------------|------|----------|------------|
| 2 | 1882849.63 | 309870624 | 62348.2109 | 61969.3711 | 4970 | Eso-51   | 1.25522788 |
| 3 | 1207041.63 | 309194816 | 62212.2383 | 61969.3711 | 4970 | Flo-1    | 0.7560311  |
| 4 | 1610113.63 | 309597888 | 62293.3398 | 61969.3711 | 4970 | JHEsoAd1 | 1.04622909 |
| 5 | 994977.688 | 308982752 | 62169.5703 | 61969.3711 | 4970 | OACP4C   | 0.61159953 |
| 6 | 1072673.63 | 309060448 | 62185.2031 | 61969.3711 | 4970 | OE-19    | 0.66388768 |
| 7 | 1527265.63 | 309515040 | 62276.6680 | 61969.3711 | 4970 | OE-33    | 0.98482186 |
| 8 | 1462177.63 | 309449952 | 62263.5742 | 61969.3711 | 4970 | SK-GT-4  | 0.93723193 |

### Quantification

#### ER alpha 90 kDa species

| Serial Number | ROI Type | Net Intensity | Sum Intensity | Mean Intensity | Interior Area (pixels) | Cell line | Normalised expression |
|---------------|----------|---------------|---------------|----------------|------------------------|-----------|-----------------------|
| 1             | Rect     | 3406329.25    | 7689244       | 20024.0723     | 384                    | Eso-26    | 1808209.32            |
| 2             | Rect     | 4694170       | 8977085       | 23377.8262     | 384                    | Eso-51    | 3739695.47            |
| 3             | Rect     | 4028274.25    | 8311189       | 21643.7207     | 384                    | Flo-1     | 5328185.89            |
| 4             | Rect     | 2227449.25    | 6510364       | 16954.0723     | 384                    | JHEsoAd1  | 2129026.3             |
| 5             | Rect     | 1436692.25    | 5719607       | 14894.8105     | 384                    | OACP4C    | 2349073.49            |
| 6             | Rect     | 1180249.25    | 5463164       | 14226.9902     | 384                    | OE-19     | 1777784.55            |
| 7             | Rect     | 3406708.25    | 7689623       | 20025.0605     | 384                    | OE-33     | 3459212.65            |
| 8             | Rect     | 2418823.25    | 6701738       | 17452.4434     | 384                    | SK-GT-4   | 2580816.08            |

#### ER alpha 74 kDa species

| Serial Number | ROI Type | Net Intensity | Sum Intensity | Mean Intensity | Interior Area (pixels) | Cell line | Normalised expression |
|---------------|----------|---------------|---------------|----------------|------------------------|-----------|-----------------------|
| 10            | Rect     | 164155.875    | 1904090       | 12205.7051     | 156                    | Eso-26    | 87140.1917            |
| 11            | Rect     | 157300.375    | 1897234.5     | 12161.7598     | 156                    | Eso-51    | 125316.19             |
| 12            | Rect     | 153451.625    | 1893385.75    | 12137.0879     | 156                    | Flo-1     | 202969.99             |
| 13            | Rect     | 462642.875    | 2202577       | 14119.084      | 156                    | JHEsoAd1  | 442200.354            |

|                            |             |                  |                  |                   |                        |              |                          |
|----------------------------|-------------|------------------|------------------|-------------------|------------------------|--------------|--------------------------|
| 14                         | Rect        | 502404.12<br>5   | 2242338.2<br>5   | 14373.9629        | 156                    | OACP4<br>C   | 821459.3                 |
| 15                         | Rect        | 558389.87<br>5   | 2298324          | 14732.8457        | 156                    | OE-19        | 841090.889               |
| 16                         | Rect        | 521005.37<br>5   | 2260939.5        | 14493.2012        | 156                    | OE-33        | 529035.142               |
| 17                         | Rect        | 363607.87<br>5   | 2103542          | 13484.2441        | 156                    | SK-GT-<br>4  | 387959.332               |
| ER alpha 70 kDa<br>species |             |                  |                  |                   |                        |              |                          |
| Serial<br>Number           | ROI<br>Type | Net<br>Intensity | Sum<br>Intensity | Mean<br>Intensity | Interior Area (pixels) | Cell<br>line | Normalised<br>expression |
| 19                         | Rect        | 51040.632<br>8   | 1790974.7<br>5   | 11480.6074        | 156                    | Eso-26       | 27094.3122               |
| 20                         | Rect        | 36437.632<br>8   | 1776371.7<br>5   | 11386.998         | 156                    | Eso-51       | 29028.6995               |
| 21                         | Rect        | 25030.632<br>8   | 1764964.7<br>5   | 11313.877         | 156                    | Flo-1        | 33107.9406               |
| 22                         | Rect        | 97506.757<br>8   | 1837440.8<br>8   | 11778.4668        | 156                    | JHEsoA<br>d1 | 93198.2857               |
| 23                         | Rect        | 82190.632<br>8   | 1822124.7<br>5   | 11680.2871        | 156                    | OACP4<br>C   | 134386.356               |
| 24                         | Rect        | 109830.13<br>3   | 1849764.2<br>5   | 11857.4629        | 156                    | OE-19        | 165434.812               |
| 25                         | Rect        | 108163.50<br>8   | 1848097.6<br>3   | 11846.7793        | 156                    | OE-33        | 109830.531               |
| 26                         | Rect        | 69679.007<br>8   | 1809613.1<br>3   | 11600.084         | 156                    | SK-GT-<br>4  | 74345.5331               |
| ER alpha 50 kDa<br>species |             |                  |                  |                   |                        |              |                          |
| Serial<br>Number           | ROI<br>Type | Net<br>Intensity | Sum<br>Intensity | Mean<br>Intensity | Interior Area (pixels) | Cell<br>line | Normalised<br>expression |
| 28                         | Rect        | 9666.5078<br>1   | 1749600.6<br>3   | 11215.3887        | 156                    | Eso-26       | 5131.35058               |
| 29                         | Rect        | 72395.632<br>8   | 1812329.7<br>5   | 11617.498         | 156                    | Eso-51       | 57675.2909               |
| 30                         | Rect        | 49307.007<br>8   | 1789241.1<br>3   | 11469.4941        | 156                    | Flo-1        | 65218.2267               |
| 31                         | Rect        | 10602.507<br>8   | 1750536.6<br>3   | 11221.3887        | 156                    | JHEsoA<br>d1 | 10134.0212               |
| 32                         | Rect        | 894.00781<br>3   | 1740828.1<br>3   | 11159.1543        | 156                    | OACP4<br>C   | 1461.75359               |
| 33                         | Rect        | -<br>767.24219   | 1739166.8<br>8   | 11148.5059        | 156                    | OE-19        | -1155.6807               |
| 34                         | Rect        | 10464.757<br>8   | 1750398.8<br>8   | 11220.5059        | 156                    | OE-33        | 10626.0413               |
| 35                         | Rect        | 11924.882<br>8   | 1751859          | 11229.8652        | 156                    | SK-GT-<br>4  | 12723.5131               |
| ER alpha 46 kDa<br>species |             |                  |                  |                   |                        |              |                          |

| Serial Number | ROI Type | Net Intensity | Sum Intensity | Mean Intensity | Interior Area (pixels) | Cell line | Normalised expression |
|---------------|----------|---------------|---------------|----------------|------------------------|-----------|-----------------------|
| 37            | Rect     | 47254.6328    | 1787188.75    | 11456.3379     | 156                    | Eso-26    | 25084.5592            |
| 38            | Rect     | 80911.0078    | 1820845.13    | 11672.084      | 156                    | Eso-51    | 64459.2184            |
| 39            | Rect     | 38171.2578    | 1778105.38    | 11398.1113     | 156                    | Flo-1     | 50489.0046            |
| 40            | Rect     | 14278.2578    | 1754212.38    | 11244.9512     | 156                    | JHEsoAd1  | 13647.3531            |
| 41            | Rect     | 341.257813    | 1740275.38    | 11155.6113     | 156                    | OACP4C    | 557.97592             |
| 42            | Rect     | 2503.25781    | 1742437.38    | 11169.4707     | 156                    | OE-19     | 3770.60443            |
| 43            | Rect     | 75583.2578    | 1815517.38    | 11637.9316     | 156                    | OE-33     | 76748.1517            |
| 44            | Rect     | 54632.8828    | 1794567       | 11503.6348     | 156                    | SK-GT-4   | 58291.7427            |

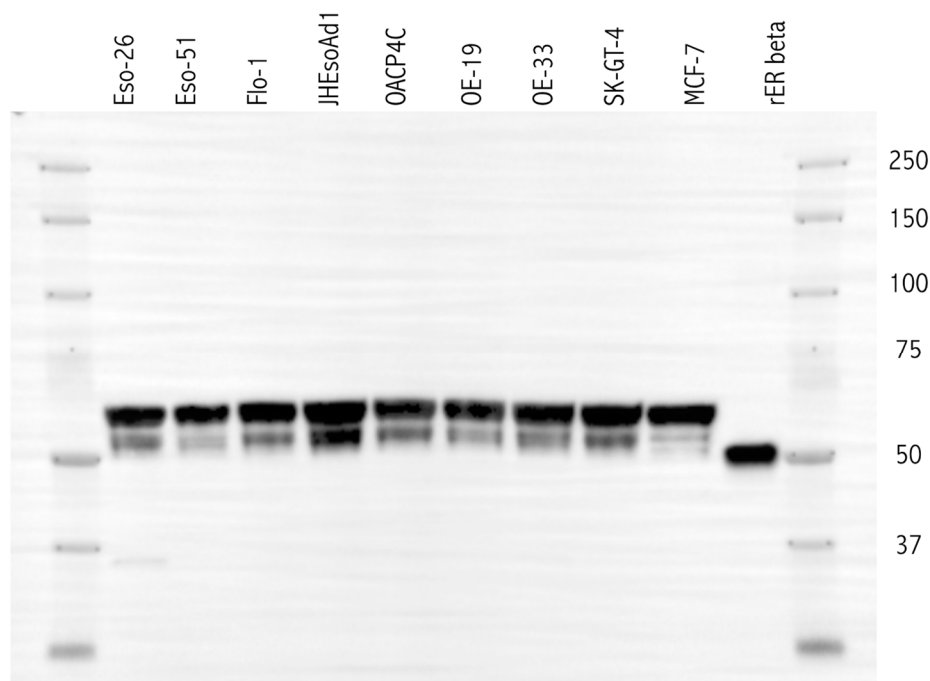

**Figure S3.** ERβ Western blot image presented in Figure 1B.

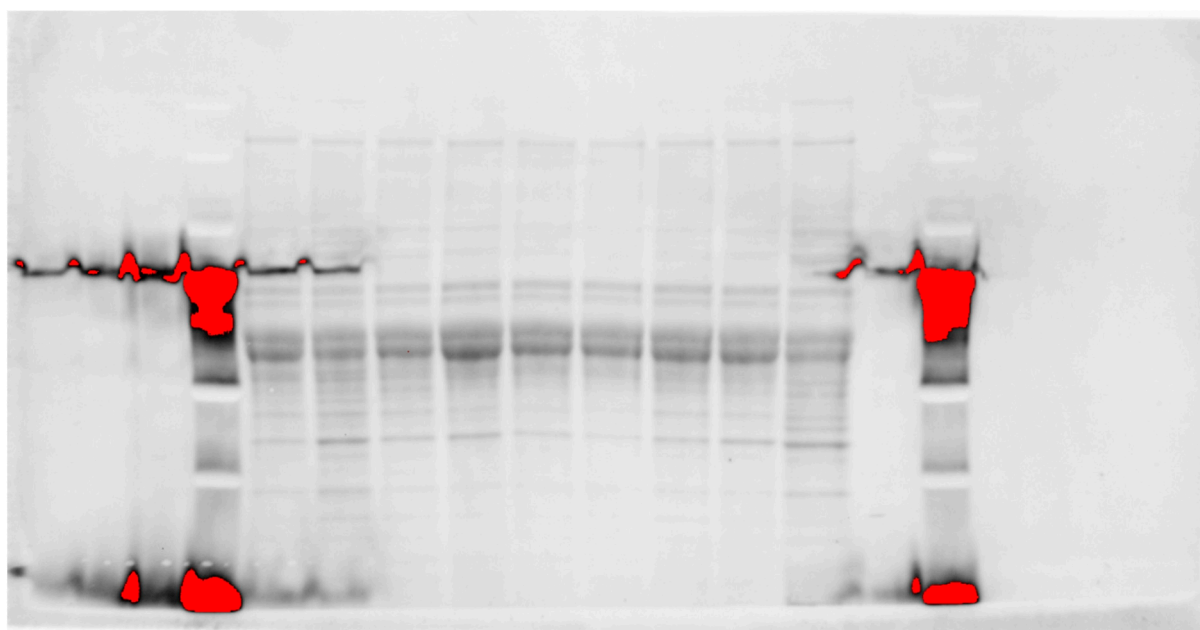

**Table S3.** Quantification data associated with ER $\beta$  blot presented in Figure 1B.

| ERβ western blot quantification |               |               |                |                  |                        |           |                      |
|---------------------------------|---------------|---------------|----------------|------------------|------------------------|-----------|----------------------|
| Protein load normalisation      |               |               |                |                  |                        |           |                      |
| Serial Number                   | Net Intensity | Sum Intensity | Mean Intensity | Bkgnd. Intensity | Interior Area (pixels) | Cell line | Normalisation Factor |
| 1                               | 2404203.88    | 425908712     | 62096.8672     | 61807.4297       | 2160                   | Eso-26    | 1.30879791           |
| 2                               | 2583395.88    | 426087904     | 62121.5117     | 61807.4297       | 2160                   | Eso-51    | 1.42622134           |
| 3                               | 1815419.75    | 425319928     | 62028.4844     | 61807.4297       | 2160                   | Flo-1     | 0.94500557           |
| 4                               | 2299547.75    | 425804056     | 62078.5664     | 61807.4297       | 2160                   | JHEsoAd1  | 1.24171905           |
| 5                               | 1484987.75    | 424989496     | 61985.7109     | 61807.4297       | 2160                   | OACP4C    | 0.75446253           |
| 6                               | 1200627.75    | 424705136     | 61946.5898     | 61807.4297       | 2160                   | OE-19     | 0.59765574           |
| 7                               | 1747459.75    | 425251968     | 62021.8867     | 61807.4297       | 2160                   | OE-33     | 0.90505549           |
| 8                               | 1727251.75    | 425231760     | 62027.8164     | 61807.4297       | 2160                   | SK-GT-4   | 0.89325366           |
| Quantification                  |               |               |                |                  |                        |           |                      |
| ER beta 59 kDa species          |               |               |                |                  |                        |           |                      |

| Serial Number                 | ROI Type | Net Intensity | Sum Intensity | Mean Intensity | Bkgnd. Intensity | Interior Area (pixels) | Cell line | Normalised expression |
|-------------------------------|----------|---------------|---------------|----------------|------------------|------------------------|-----------|-----------------------|
| 1                             | Rect     | 10019864      | 10073403      | 30525.4648     | 162.238281       | 330                    | Eso-26    | 7655776.27            |
| 2                             | Rect     | 9130841       | 9184380       | 27831.4531     | 162.238281       | 330                    | Eso-51    | 6402120.6             |
| 3                             | Rect     | 11055988      | 11109527      | 33665.2344     | 162.238281       | 330                    | Flo-1     | 11699389.3            |
| 4                             | Rect     | 12439573      | 12493112      | 37857.9141     | 162.238281       | 330                    | JHEso Ad1 | 10018025.4            |
| 5                             | Rect     | 9373757       | 9427296       | 28567.5625     | 162.238281       | 330                    | OACP 4C   | 12424416.8            |
| 6                             | Rect     | 9204273       | 9257812       | 28053.9766     | 162.238281       | 330                    | OE-19     | 15400626.9            |
| 7                             | Rect     | 10235905      | 10289444      | 31180.1328     | 162.238281       | 330                    | OE-33     | 11309698.8            |
| 8                             | Rect     | 11740353      | 11793892      | 35739.0664     | 162.238281       | 330                    | SK-GT-4   | 13143358.4            |
| <b>ER beta 54 kDa species</b> |          |               |               |                |                  |                        |           |                       |
| Serial Number                 | ROI Type | Net Intensity | Sum Intensity | Mean Intensity | Bkgnd. Intensity | Interior Area (pixels) | Cell line | Normalised expression |
| 10                            | Rect     | 4730130       | 4783668.5     | 14495.9648     | 162.238281       | 330                    | Eso-26    | 3614102.65            |
| 11                            | Rect     | 2787205.75    | 2840744.5     | 8608.31641     | 162.238281       | 330                    | Eso-51    | 1954258.91            |
| 12                            | Rect     | 4817010       | 4870548.5     | 14759.2383     | 162.238281       | 330                    | Flo-1     | 5097335.06            |
| 13                            | Rect     | 8518917       | 8572456       | 25977.1406     | 162.238281       | 330                    | JHEso Ad1 | 6860583.34            |
| 14                            | Rect     | 5079654       | 5133192.5     | 15555.1289     | 162.238281       | 330                    | OACP 4C   | 6732811.47            |
| 15                            | Rect     | 3616365.5     | 3669904.25    | 11120.9219     | 162.238281       | 330                    | OE-19     | 6050917.4             |
| 16                            | Rect     | 5017477.5     | 5071016       | 15366.7148     | 162.238281       | 330                    | OE-33     | 5543834.09            |
| 17                            | Rect     | 5870545.5     | 5924084       | 17951.7695     | 162.238281       | 330                    | SK-GT-4   | 6572092.27            |

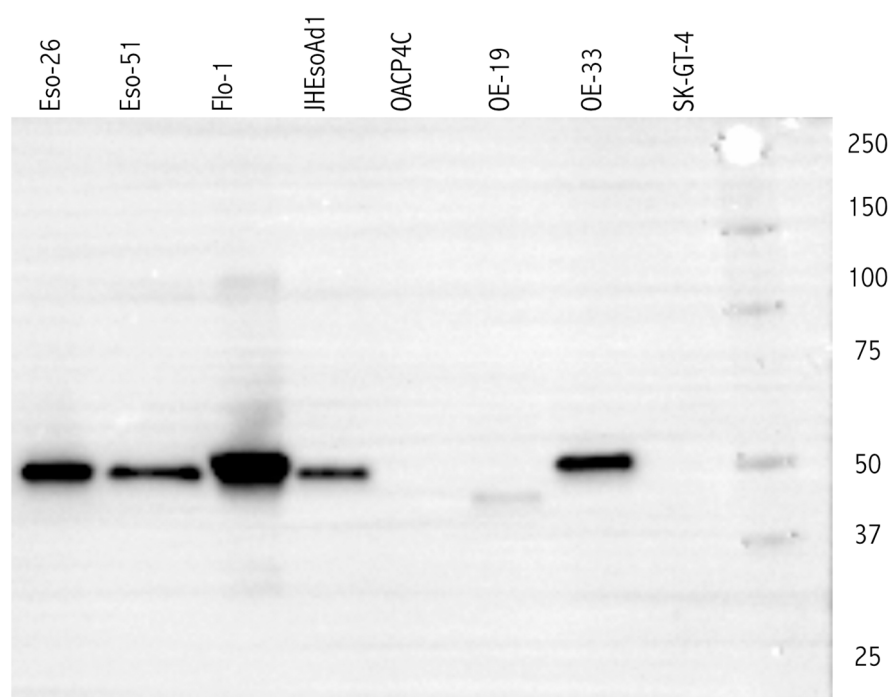

**Figure S5.** p53 Western blot image presented in Figure 4.

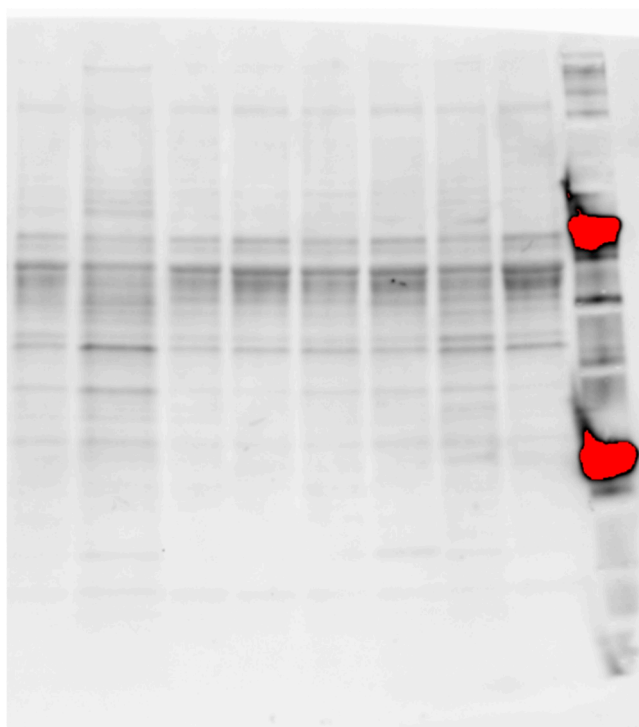

**Figure S6.** Total protein load image associated with Figure S5.



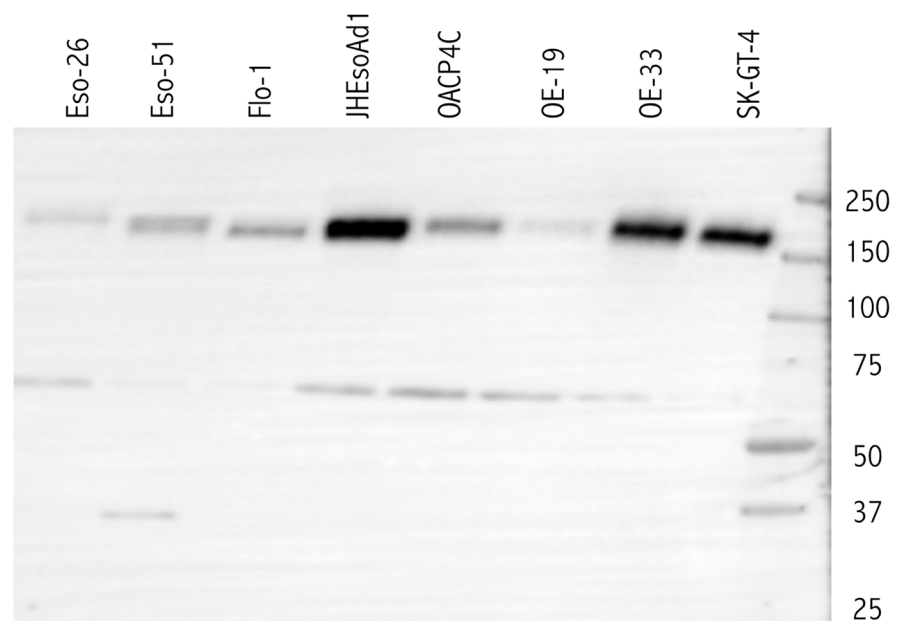

**Figure S7.** EGFR Western blot image presented in Figure 4.

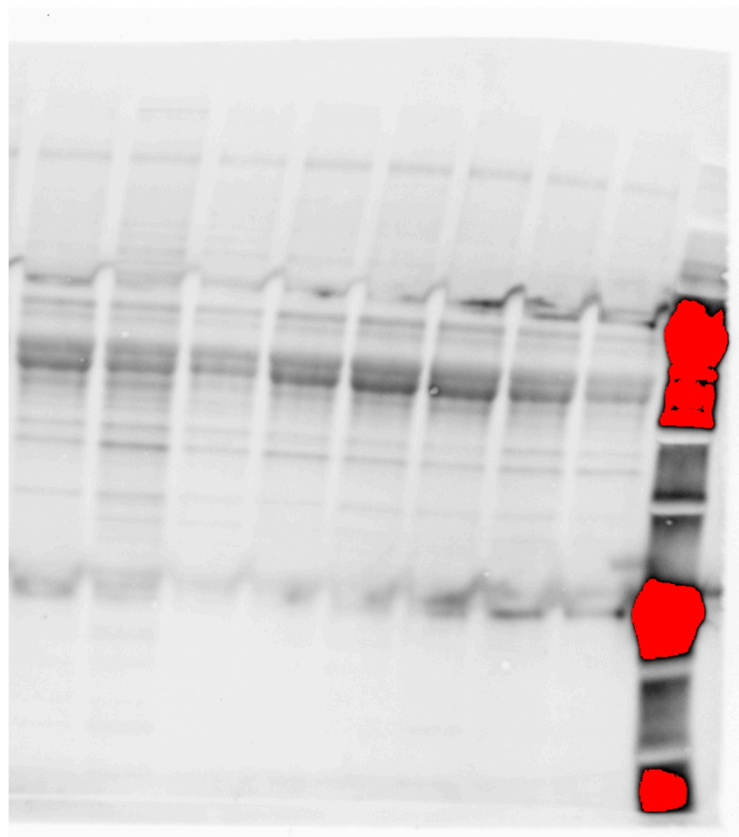

**Figure S8.** Total protein load image associated with Figure S7.

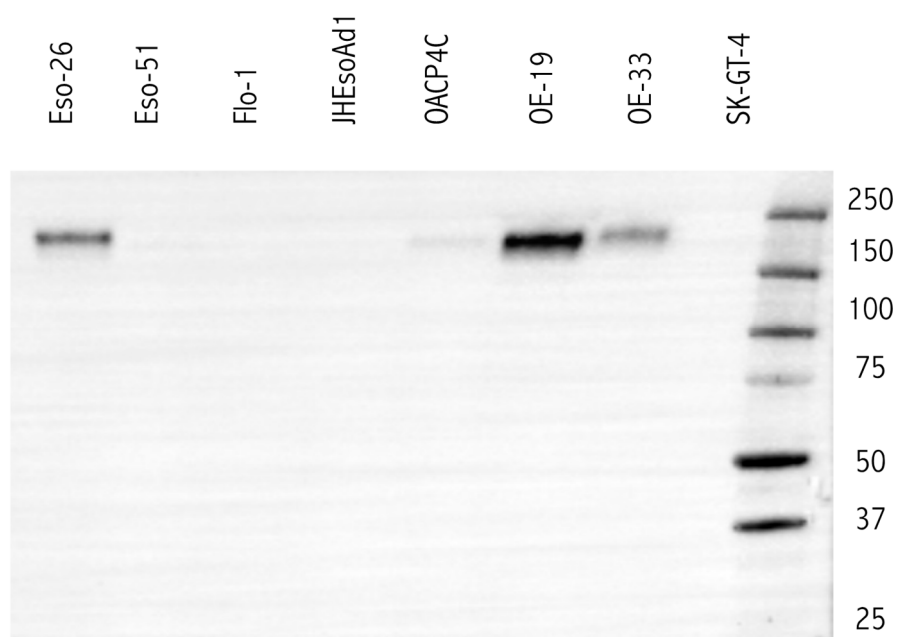

**Figure S9.** HER2 Western blot image presented in Figure 4.

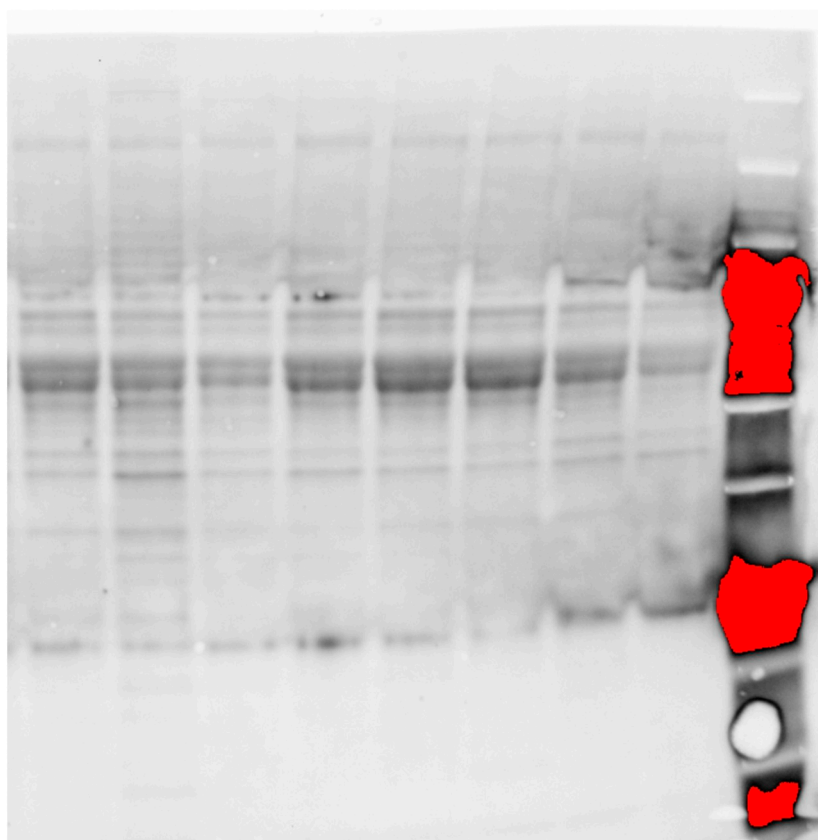

**Figure S10.** Total protein load image associated with Figure S9.

**Table S4.** Quantification data associated with p53 blot presented in Figure 4.

| p53 western blot normalisation |               |               |                |                  |                        |                        |                     |                     |                      |           |           |
|--------------------------------|---------------|---------------|----------------|------------------|------------------------|------------------------|---------------------|---------------------|----------------------|-----------|-----------|
| Protein load normalisation     |               |               |                |                  |                        |                        |                     |                     |                      |           |           |
| Serial Number                  | Net Intensity | Sum Intensity | Mean Intensity | Bkgnd. Intensity | Interior Area (pixels) | Lysate                 | Normalisation (NET) | Normalisation (SUM) | Normalisation (MEAN) |           |           |
| 9                              | 1,420,188.00  | 2,731,231.00  | 679.918098     | 326.373662       | 2490                   | 16<br>Eso-26           | 0.93578961          | 0.96555             | 0.96555              |           |           |
| 10                             | 1,618,194.00  | 2,929,237.00  | 729.210107     | 326.373662       | 2490                   | 16<br>Eso-51           | 1.06625963          | 1.03554946          | 1.03554946           |           |           |
| 11                             | 1,127,222.00  | 2,438,265.00  | 606.986557     | 326.373662       | 2490                   | 16<br>Flo-1            | 0.74274859          | 0.8619801           | 0.8619801            |           |           |
| 12                             | 1,260,737.00  | 2,571,780.00  | 640.224048     | 326.373662       | 2490                   | 16<br>JHEso            | 0.83072423          | 0.90918058          | 0.90918058           |           |           |
| 13                             | 1,224,792.00  | 2,535,835.00  | 631.275828     | 326.373662       | 2490                   | 16<br>OAC              | 0.80703937          | 0.89647323          | 0.89647323           |           |           |
| 14                             | 1,627,776.00  | 2,938,819.00  | 731.595469     | 326.373662       | 2490                   | 16<br>OE-19            | 1.0725734           | 1.0389369           | 1.0389369            |           |           |
| 15                             | 1,923,761.00  | 3,234,804.00  | 805.278566     | 326.373662       | 2490                   | 16<br>OE-33            | 1.26760369          | 1.14357409          | 1.14357409           |           |           |
| 16                             | 1,938,418.00  | 3,249,461.00  | 808.927309     | 326.373662       | 2490                   | 16<br>SKGT4            | 1.27726148          | 1.14875566          | 1.14875566           |           |           |
| Quantification                 |               |               |                |                  |                        |                        |                     |                     |                      |           |           |
| p53<br>Serial Number           | ROI Type      | Net Intensity | Sum Intensity  | Mean Intensity   | Bkgnd. Intensity       | Interior Area (pixels) | Lysate              | Normalised (Net)    | Normalised (Sum)     | Raw (Net) | Raw (Sum) |
| 9                              | Rect          | 1,083,532.00  | 1,085,444.00   | 6,167.30         | 10.863636              | 176                    | 16<br>Eso-26        | 1157879.92          | 1122191.5            | 1083532   | 1085444   |
| 10                             | Rect          | 518,184.00    | 520,096.00     | 2,955.09         | 10.863636              | 176                    | 16<br>Eso-51        | 485982.95           | 500395.222           | 518184    | 520096    |
| 11                             | Rect          | 2,995,984.00  | 2,997,896.00   | 17,033.50        | 10.863636              | 176                    | 16<br>Flo-1         | 4033644.81          | 3475699.74           | 2995984   | 2997896   |

**Table S5.** Quantification data associated with EGFR blot presented in Figure 4.

| EGFR western quantification |               |               |                |                            |                        |        |                     |                     |                      |
|-----------------------------|---------------|---------------|----------------|----------------------------|------------------------|--------|---------------------|---------------------|----------------------|
| Serial Number               | Net Intensity | Sum Intensity | Mean Intensity | Protein load normalisation |                        |        | Normalisation (NET) | Normalisation (SUM) | Normalisation (MEAN) |
|                             |               |               |                | Bkgnd. Intensity           | Interior Area (pixels) | Lysate |                     |                     |                      |
| 9                           | 590,74        | 3,284,7       | 643.56         | 527.819                    | 5104                   | 16     | 0.79062947          | 0.95453933          | 0.954                |
|                             | 5.00          | 37.00         | 1324           | 749                        |                        | Eso-26 |                     |                     | 5393                 |
| 10                          | 788,82        | 3,482,8       | 682.37         | 527.819                    | 5104                   | 16     | 1.0557345           | 1.01210164          | 1.012                |
|                             | 7.00          | 19.00         | 0494           | 749                        |                        | Eso-51 |                     |                     | 1016                 |
| 11                          | 543,96        | 3,237,9       | 634.39         | 527.819                    | 5104                   | 16     | 0.72802099          | 0.94094514          | 0.940                |
|                             | 5.00          | 57.00         | 5964           | 749                        |                        | Flo-1  |                     |                     | 9451                 |
| 12                          | 690,55        | 3,384,5       | 663.11         | 527.819                    | 5104                   | 16     | 0.9242152           | 0.98354483          | 0.983                |
|                             | 8.00          | 50.00         | 7163           | 749                        |                        | JHEso  |                     |                     | 5448                 |
| 13                          | 519,20        | 3,213,1       | 629.54         | 527.819                    | 5104                   | 16     | 0.69488186          | 0.93374963          | 0.933                |
|                             | 4.00          | 96.00         | 4671           | 749                        |                        | OA-C   |                     |                     | 7496                 |
| 14                          | 728,79        | 3,422,7       | 670.60         | 527.819                    | 5104                   | 16     | 0.97538472          | 0.99465528          | 0.994                |
|                             | 1.00          | 83.00         | 7955           | 749                        |                        | OE-19  |                     |                     | 6552                 |
| 15                          | 1,044,035.00  | 3,738,027.00  | 732.372061     | 527.819749                 | 5104                   | 16     | 1.39729467          | 1.08626468          | 1.086                |
|                             |               |               |                |                            |                        | OE-33  |                     |                     | 2646                 |
| 16                          | 1,071,340.00  | 3,765,332.00  | 737.721787     | 527.819749                 | 5104                   | 16     | 1.43383859          | 1.09419947          | 1.094                |
|                             |               |               |                |                            |                        | SKGT4  |                     |                     | 1994                 |

| Serial Number | ROI Type | Net Intensity | Sum Intensity | Mean Intensity | Bkgnd. Intensity | Interior Area (pixels) | Lysate       | Normalised (Net) | Normalised (Sum) | Raw (Net) | Raw (Sum) |
|---------------|----------|---------------|---------------|----------------|------------------|------------------------|--------------|------------------|------------------|-----------|-----------|
| 9             | Rect     | 20,300.00     | 52,912.00     | 229.056277     | 141.177489       | 231                    | 16<br>Eso-26 | 25675.7441       | 21266.8031       | 20300     | 52912     |
| 10            | Rect     | 254,164.00    | 286,776.00    | 1,241.45       | 141.177489       | 231                    | 16<br>Eso-51 | 240746.135       | 251124.975       | 254164    | 286776    |
| 11            | Rect     | 213,140.00    | 245,752.00    | 1,063.86       | 141.177489       | 231                    | 16<br>Flo-1  | 292766.283       | 226516.926       | 213140    | 245752    |
| 12            | Rect     | 3,197,056.00  | 3,229,668.00  | 13,981.25      | 141.177489       | 231                    | 16<br>JHEso  | 3459211.67       | 3250544.26       | 3197056   | 3229668   |
| 13            | Rect     | 755,060.00    | 787,672.00    | 3,409.84       | 141.177489       | 231                    | 16<br>OAC    | 1086601.97       | 808632.181       | 755060    | 787672    |
| 14            | Rect     | 154,092.00    | 186,704.00    | 808.242424     | 141.177489       | 231                    | 16<br>OE-19  | 157980.741       | 154920.004       | 154092    | 186704    |
| 15            | Rect     | 4,630,944.00  | 4,663,556.00  | 20,188.55      | 141.177489       | 231                    | 16<br>OE-33  | 3314221.47       | 4263181.97       | 4630944   | 4663556   |
| 16            | Rect     | 4,123,332.00  | 4,155,944.00  | 17,991.10      | 141.177489       | 231                    | 16<br>SKGT4  | 2875729.54       | 3768354.96       | 4123332   | 4155944   |

Table S6. Quantification data associated with HER2 blot presented in Figure 4.

| HER2 western quantification |               |               |                |                  |                        |              |                     |                     |                      |       |
|-----------------------------|---------------|---------------|----------------|------------------|------------------------|--------------|---------------------|---------------------|----------------------|-------|
| Protein load normalisation  |               |               |                |                  |                        |              |                     |                     |                      |       |
| Serial Number               | Net Intensity | Sum Intensity | Mean Intensity | Bkgnd. Intensity | Interior Area (pixels) | Lysate       | Normalisation (NET) | Normalisation (SUM) | Normalisation (MEAN) |       |
| 9                           | 1,503,320.00  | 3,966,374.00  | 896.558318     | 556.748192       | 4424                   | 16<br>Eso-26 | 0.90043513          | 0.95977634          | 0.959                | 77634 |
| 10                          | 1,815,566.00  | 4,278,620.00  | 967.138336     | 556.748192       | 4424                   | 16<br>Eso-51 | 1.08745936          | 1.03533309          | 1.035                | 33309 |
| 11                          | 1,252,058.00  | 3,715,112.00  | 839.76311      | 556.748192       | 4424                   | 16<br>Flo-1  | 0.74993814          | 0.8989764           | 0.898                | 9764  |
| 12                          | 1,577,772.00  | 4,040,826.00  | 913.387432     | 556.748192       | 4424                   | 16<br>JHEso  | 0.94502922          | 0.97779211          | 0.977                | 79211 |
| 13                          | 2,011,329.00  | 4,474,383.00  | 1,011.39       | 556.748192       | 4424                   | 16<br>OAC    | 1.20471442          | 1.08270349          | 1.082                | 70349 |

|    |              |              |            |            |      |                 |            |            |            |       |
|----|--------------|--------------|------------|------------|------|-----------------|------------|------------|------------|-------|
| 14 | 1,925,760.00 | 4,388,814.00 | 992.046564 | 556.748192 | 4424 | 16<br>OE-19     | 1.15346164 | 1.06199765 | 1.06199765 | 99765 |
| 15 | 1,901,823.00 | 4,364,877.00 | 986.63585  | 556.748192 | 4424 | 16<br>OE-33     | 1.13912423 | 1.05620541 | 1.05620541 | 20541 |
| 16 | 1,368,759.00 | 3,831,813.00 | 866.142179 | 556.748192 | 4424 | 16<br>SK<br>GT4 | 0.81983788 | 0.92721551 | 0.92721551 | 21551 |

### Quantification

#### HER2 200 kD

| Serial Number | ROI Type | Net Intensity | Sum Intensity | Mean Intensity | Bkgnd. Intensity | Interior Area (pixels) | Lysate          | Normalised (Net) | Normalised (Sum) | Raw (Net) | Raw (Sum) |
|---------------|----------|---------------|---------------|----------------|------------------|------------------------|-----------------|------------------|------------------|-----------|-----------|
| 9             | Rect     | 478,452.00    | 481,812.00    | 2,190.05       | 15.272727        | 220                    | 16<br>Eso-26    | 531356.437       | 498503.639       | 478452    | 481812    |
| 10            | Rect     | 4,200.00      | 7,560.00      | 34.363636      | 15.272727        | 220                    | 16<br>Eso-51    | 3862.21331       | 4056.66546       | 4200      | 7560      |
| 11            | Rect     | 2,748.00      | 6,108.00      | 27.763636      | 15.272727        | 220                    | 16<br>Flo-1     | 3664.30224       | 3056.80995       | 2748      | 6108      |
| 12            | Rect     | 1,952.00      | 5,312.00      | 24.145455      | 15.272727        | 220                    | 16<br>JHEso     | 2065.5446        | 1996.33437       | 1952      | 5312      |
| 13            | Rect     | 44,920.00     | 48,280.00     | 219.454545     | 15.272727        | 220                    | 16<br>OAC       | 37286.8452       | 41488.7368       | 44920     | 48280     |
| 14            | Rect     | 4,544,412.00  | 4,547,772.00  | 20,671.69      | 15.272727        | 220                    | 16<br>OE-19     | 3939803.33       | 4279116.82       | 4544412   | 4547772   |
| 15            | Rect     | 620,356.00    | 623,716.00    | 2,835.07       | 15.272727        | 220                    | 16<br>OE-33     | 544590.297       | 587344.083       | 620356    | 623716    |
| 16            | Rect     | 2,236.00      | 5,596.00      | 25.436364      | 15.272727        | 220                    | 16<br>SK<br>GT4 | 2727.36849       | 2411.52136       | 2236      | 5596      |

### Receptor expression and treatment response experiments

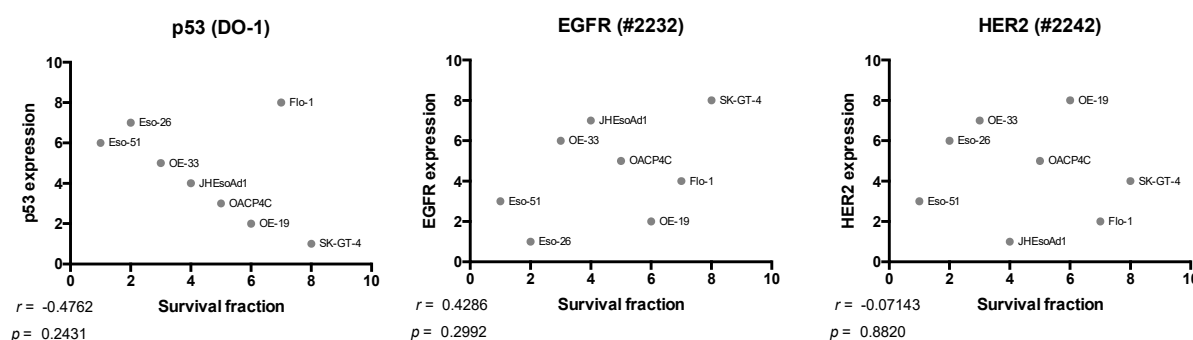

**Figure S11.** Scatterplots of rank showing relationship between survival fraction and the expression of p53, EGFR, and HER2, in all cell lines.

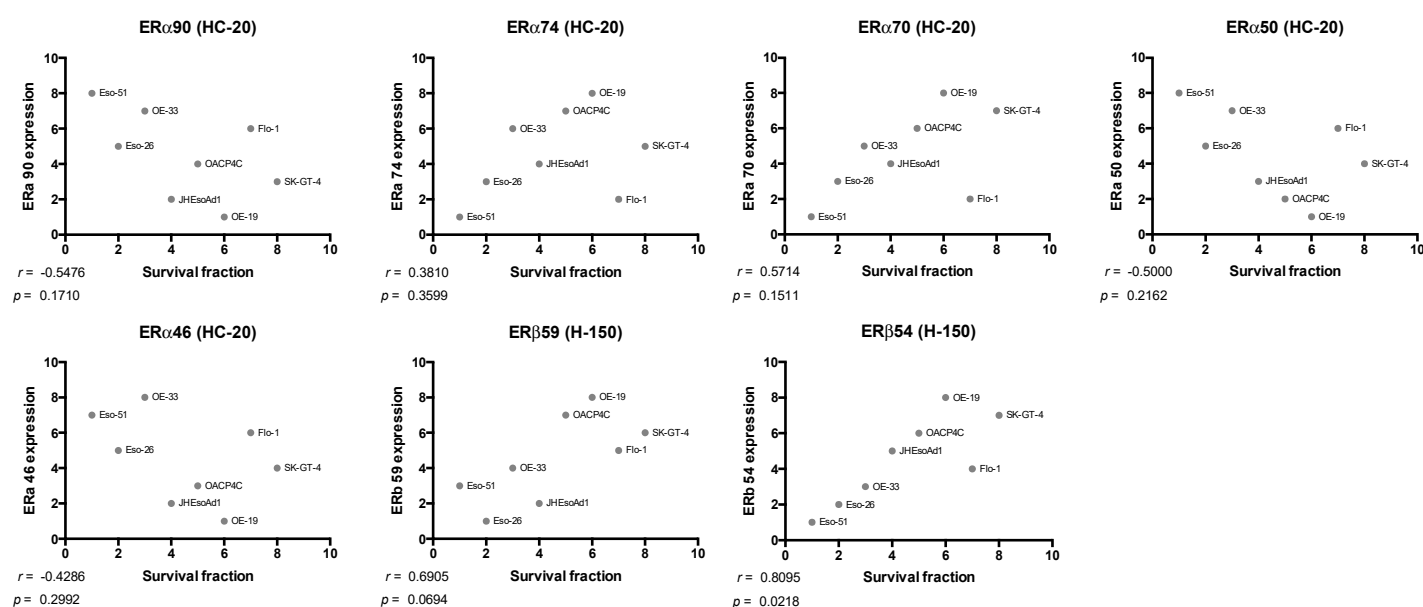

**Figure S12.** Scatterplots of ranks showing relationship between survival fraction and the expression of ERα and ERβ species, in all cell lines.

**Table S7. TP53 mutations in oesophageal adenocarcinoma cell lines, and their consequences.** c., CDNA sequence; p., protein (amino acid) sequence; \*, nonsense (noncoding) substitution; ins, nucleotide insertion; fs, frameshift; SIFT, Sorting Intolerant From Tolerant (program that predicts the effects of amino acid substitutions upon protein function) [8]; COSMIC, Catalogue of Somatic Mutations in Cancer [9]; IARC, International Agency for Research on Cancer TP53 mutation database [10]; na, not available. Reproduced with permission from [11].

| Cell line. | TP53 DNA Mutation | p53 Protein Mutation | p53 Domain         | Phenotype             | Transcriptional Activity Class | SIFT Prediction | Reference    |
|------------|-------------------|----------------------|--------------------|-----------------------|--------------------------------|-----------------|--------------|
| Eso-26     | c.742C>T          | p.R248W              | DNA binding domain | Missense substitution | Non-functional                 | Deleterious     | COSMIC, IARC |
| Eso-51     | c.524G>A          | p.R175H              | DNA binding domain | Missense substitution | Non-functional                 | Deleterious     | COSMIC, IARC |
| Flo-1      | c.830G>T          | p.C277F              | DNA binding domain | Missense substitution | Non-functional                 | Deleterious     | COSMIC, IARC |
| JH-EsoAd1  | c.797G>A          | p.G266E              | DNA binding domain | Missense substitution | Non-functional                 | Deleterious     | [3], IARC    |

|         |               |             |                            |                                      |                |             |              |
|---------|---------------|-------------|----------------------------|--------------------------------------|----------------|-------------|--------------|
| OACP4C  | c.574C>T      | p.Q192*     | DNA binding domain         | Nonsense substitution (? Truncation) | na             | na          | COSMIC, IARC |
| OE-19   | c.927_928insA | p.N310fs*27 | Homooligomerisation domain | Frameshift insertion                 |                |             | COSMIC       |
|         | c.929_930ins1 | p.?         | Homooligomerisation domain | Frameshift insertion                 | na             | na          | IARC         |
| OE-33   | c.404G>A      | p.C135Y     | DNA binding domain         | Missense substitution                | Non-functional | Deleterious | COSMIC, IARC |
| SK-GT-4 | c.298C>T      | p.Q100*     | DNA binding domain         | Nonsense substitution (? Truncation) | na             | na          | COSMIC, IARC |
|         | c.524G>A      | p.R175H     | DNA binding domain         | Missense substitution                | Non-functional | Deleterious | IARC         |

## References

- Boonstra, J. J.; van Marion, R.; Beer, D.G.; Lin, L.; Chaves, P.; Ribeiro, C.; Pereira, A.D.; Roque, L.; Darnton, S.J.; Altorki, N.K. et al., Verification and unmasking of widely used human esophageal adenocarcinoma cell lines. *J Natl Cancer Inst*, **2010**, *102*, 271–274.
- Hughes, S. J., Nambu, Y.; Soldes, O.S.; Hamstra, D.; Rehemtulla, A.; Iannettoni, M.D.; Orringer, M.B.; Beer, D.G. Fas/APO-1 (CD95) is not translocated to the cell membrane in esophageal adenocarcinoma. *Cancer Res*, **1997**, *57*, 5571–5578.
- Alvarez, H.; Koorstra, J.B.; Hong, S.M.; Boonstra, J.J.; Dinjens, W.N.; Foratiere, A.A.; Wu, T.T.; Montgomery, E.; Eshleman, J.R.; Maitra, A. Establishment and characterization of a bona fide Barrett esophagus-associated adenocarcinoma cell line. *Cancer Biol Ther*, **2008**, *7*, 1753–1755.
- de Both, N. J.; Wijnhoven, B.P.L.; Sleddens, H.F.B.M.; Tilanus, H.W.; Dinjens, W.N.M. Establishment of cell lines from adenocarcinomas of the esophagus and gastric cardia growing in vivo and in vitro. *Virchows Archiv*, **2001**, *438*, 451–456.
- Rockett, J. C.; Larkin, K.; Darnton, S.J.; Morris, A.G.; Matthews, H.R. Five newly established oesophageal carcinoma cell lines: phenotypic and immunological characterization. *Br J Cancer*, **1997**, *75*, 258–263.
- Altorki, N.; Schwartz, G.K.; Blundell, M.; Davis, B.M.; Kelsen, D.P.; Albino, A.P. Characterization of cell lines established from human gastric-esophageal adenocarcinomas. Biologic phenotype and invasion potential. *Cancer*, **1993**, *72*, 649–657.
- Soule, H. D.; Vazquez, J.; Long, A.; Albert, S.; Brennan, M. A human cell line from a pleural effusion derived from a breast carcinoma. *J Natl Cancer Inst*, **1973**, *51*, 1409–1416.
- Sim, N.L.; Kumar, P.; Hu, J.; Henikoff, S.; Schneider, G.; Ng, P.C. SIFT web server: predicting effects of amino acid substitutions on proteins. *Nucleic Acids Research*, **2012**, *40*, 452–457.
- Forbes, S. A.; Beare, D.; Boutselakis, H.; Bamford, S.; Bindal, N.; Tate, J.; Cole, C.G.; Ward, S.; Dawson, E.; Ponting, L. et al., COSMIC: somatic cancer genetics at high-resolution. *Nucleic Acids Res*, **2017**, *45*, 777–783.
- Bouaoun, L.; Sonkin, D.; Ardin, M.; Hollstein, M.; Byrnes, G.; Zavadil, J.; Olivier, M. TP53 Variations in Human Cancers: New Lessons from the IARC TP53 Database and Genomics Data. *Hum Mutat*, **2016**, *37*, 865–876.
- Butz, F.; Eichelmann, A.-K.; Mayne, G.C.; Wang, T.; Bastian, I.; Chiam, K.; Marri, S.; Sykes, P.J.; Wijnhoven, B.P.; Toxopeus, E. et al. MicroRNA Profiling in Oesophageal Adenocarcinoma Cell Lines and Patient Serum Samples Reveals a Role for miR-451a in Radiation Resistance. *International Journal of Molecular Sciences*. **2020**; *21*, 8898.
